# Supplementary material for: Platelet bio-nanobubbles as microvascular recanalization nanoformulation for acute ischemic stroke lesion theranostics
Source: PubMed Central journal article supplement — Theranostics. 2018 Sep 9;8(18):4870–83. doi: 10.7150/thno.27466 (PMC6217069; doi:10.7150/thno.27466), 2018-09-09
Supplement: thnov08p4870s1.pdf [file thnov08p4870s1.pdf]

## Supplementary Material

### **Platelet bio-nanobubbles as microvascular recanalization nanoformulation for the acute ischemic stroke lesion theranostics**

Mingxi Li<sup>1,2</sup>, Yang Liu<sup>1,2</sup>, Jinpeng Chen<sup>3</sup>, Taotao Liu<sup>1</sup>, Zhuxiao Gu<sup>2</sup>, Jianqiong Zhang<sup>3</sup>, Xiaochun Gu<sup>4</sup>, Gaojun Teng<sup>4</sup>, Fang Yang<sup>1,2\*</sup> and Ning Gu<sup>1,2\*</sup>

<sup>1</sup>State key Laboratory of Bioelectronics, Jiangsu Key Laboratory for Biomaterials and Devices, School of Biological Sciences & Medical Engineering, Southeast University, Nanjing, 210096, China

<sup>2</sup>Collaborative Innovation Center of Suzhou Nano-Science and Technology, Southeast University, Suzhou 215123, China

<sup>3</sup>Jiangsu Key Laboratory of Molecular and Functional Imaging, Department of Microbiology and Immunology, Medical School, Southeast University, Nanjing 210009, China

<sup>4</sup>Jiangsu Key Laboratory of Molecule and Functional Imaging, Department of Radiology, Zhongda Hospital, Medical School, Southeast University, Nanjing 210009, PR China

\* Correspondence and requests for materials should be addressed to F. Y. (Email: yangfang2080@seu.edu.cn) and N. G. (Email: guning@seu.edu.cn).

### **The supplementary material includes:**

Figures S1-12

Tables S1-2

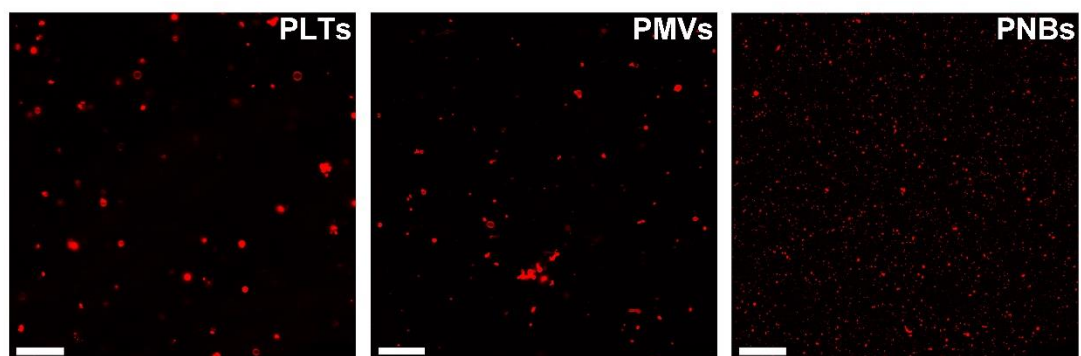

**Figure S1.** Confocal fluorescent images of PLTs, PMVs, PNBs. Scale bar, 25  $\mu\text{m}$ .

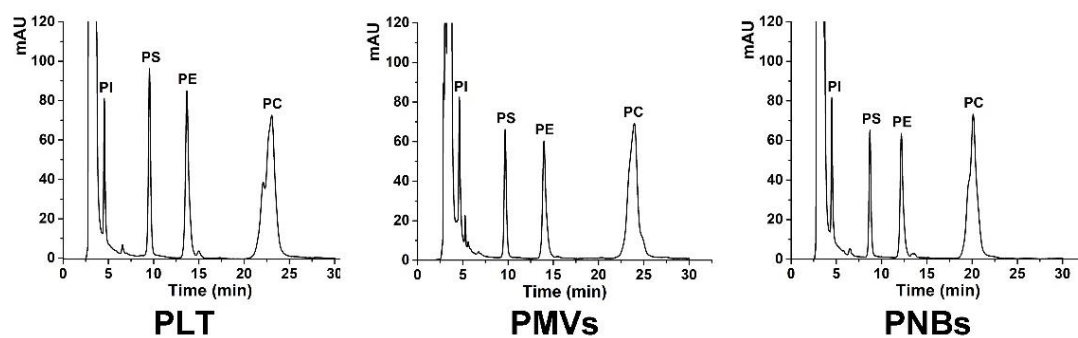

**Figure S2.** The HPLC chromatograms of four main phospholipids of phosphatidylinositol (PI), phosphatidylserine (PS), phosphatidylethanolamine (PE), and phosphatidylcholine (PC) in PLT, PMVs and PNBs.

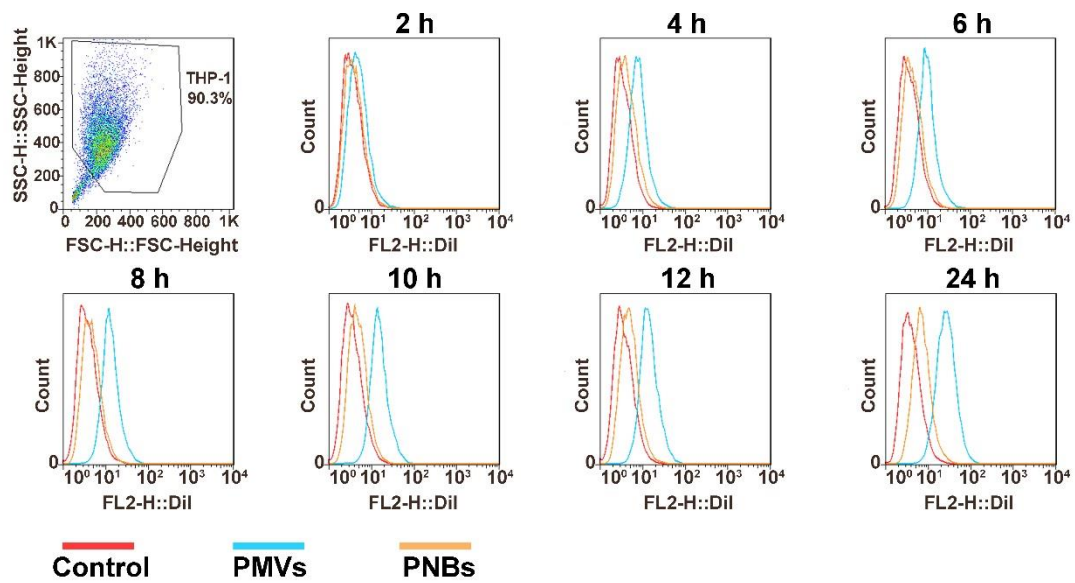

**Figure S3.** Flow cytometry measurement of cell uptake efficiency. Normalized fluorescence intensity of DiI-labeled PMVs (blue color) and PNBs (orange color) uptake by human THP-1 macrophage-like cells after different incubation time (2, 4, 6, 8, 10, 12, and 24 h) based on flow cytometric analysis (n= 3).

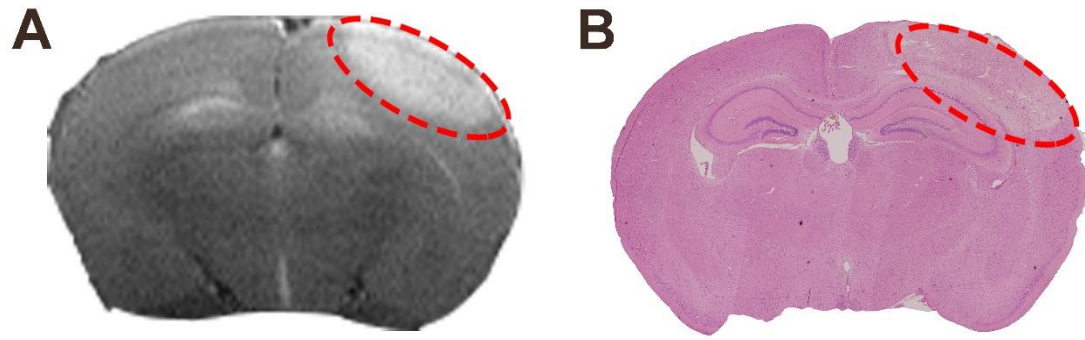

**Figure S4.** (A) Magnetic resonance imaging of the brain for the stroke mouse. (B) Hematoxylin/ eosin (HE) staining of the whole brain for the stroke mouse.

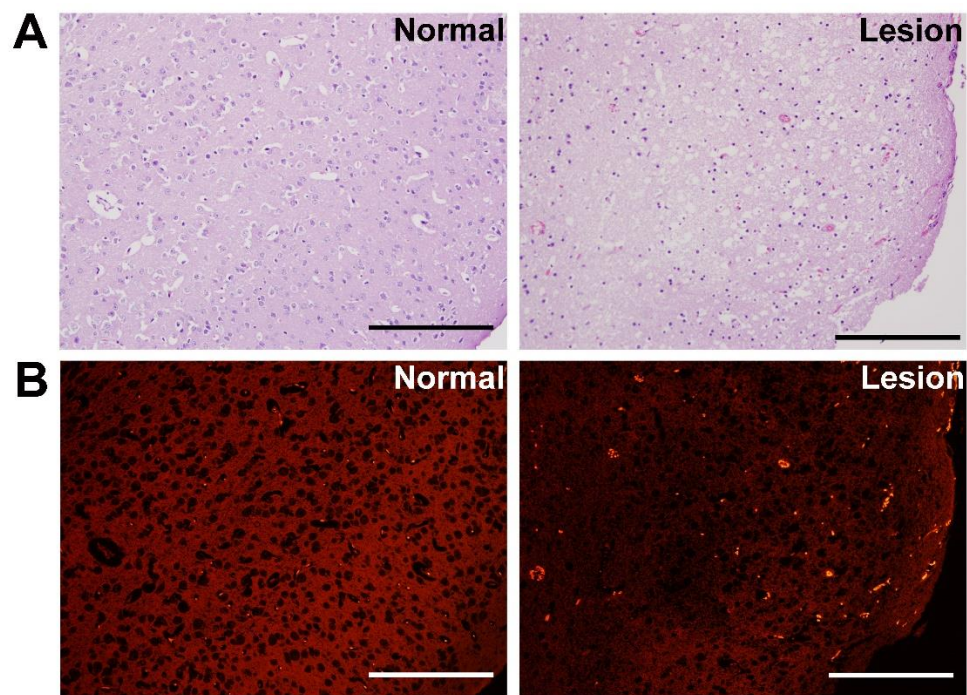

**Figure S5.** Histological analysis of the brain stroke 8 h post-injection of DiI-labeled PNBs. **(A)** Optical bright field images of normal brain tissue and stroke lesion brain tissue. **(B)** Fluorescence images of normal brain tissue and stroke lesion brain tissue. All scale bars, 200  $\mu\text{m}$ .

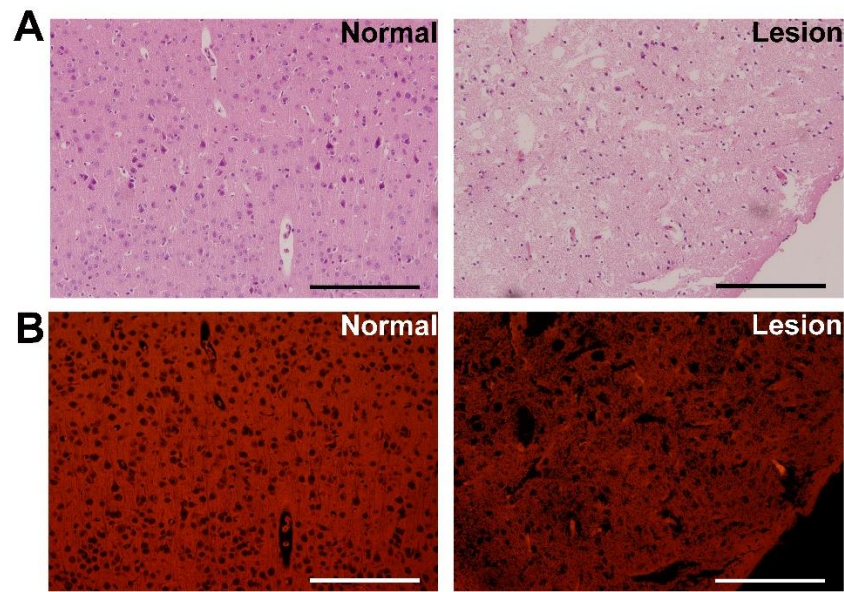

**Figure S6.** Histological analysis of the brain stroke 8 h post-injection of DiI-labeled PMVs. **(A)** Optical bright field images of normal brain tissue and stroke lesion brain tissue. **(B)** Fluorescence images of normal brain tissue and stroke lesion brain tissue. All scale bars, 200  $\mu\text{m}$ .

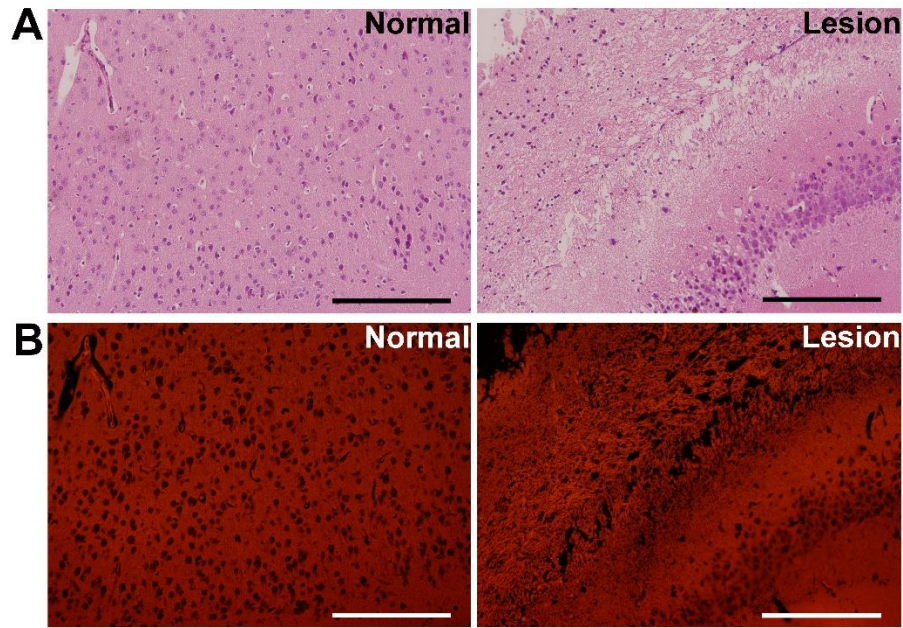

**Figure S7.** Histological analysis of the brain stroke 8 h post-injection of PBS. **(A)** Optical bright field images of normal brain tissue and stroke lesion brain tissue. **(B)** Fluorescence images of normal brain tissue and stroke lesion brain tissue. All scale bars, 200  $\mu\text{m}$ .

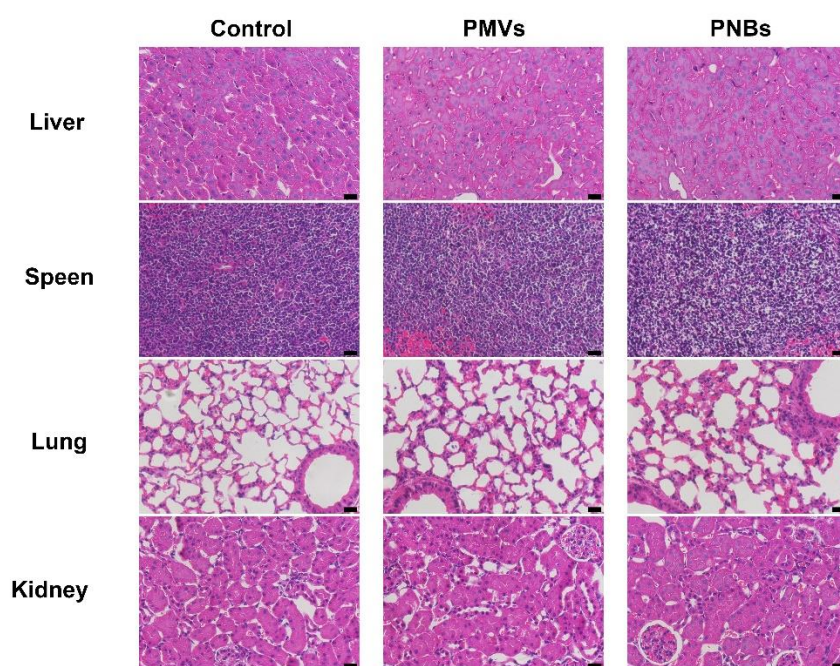

**Figure S8.** Histological analysis of excised major organs (liver, spleen, lung, and kidney) at 8 h after PBS, PMVs, PNBs injection.

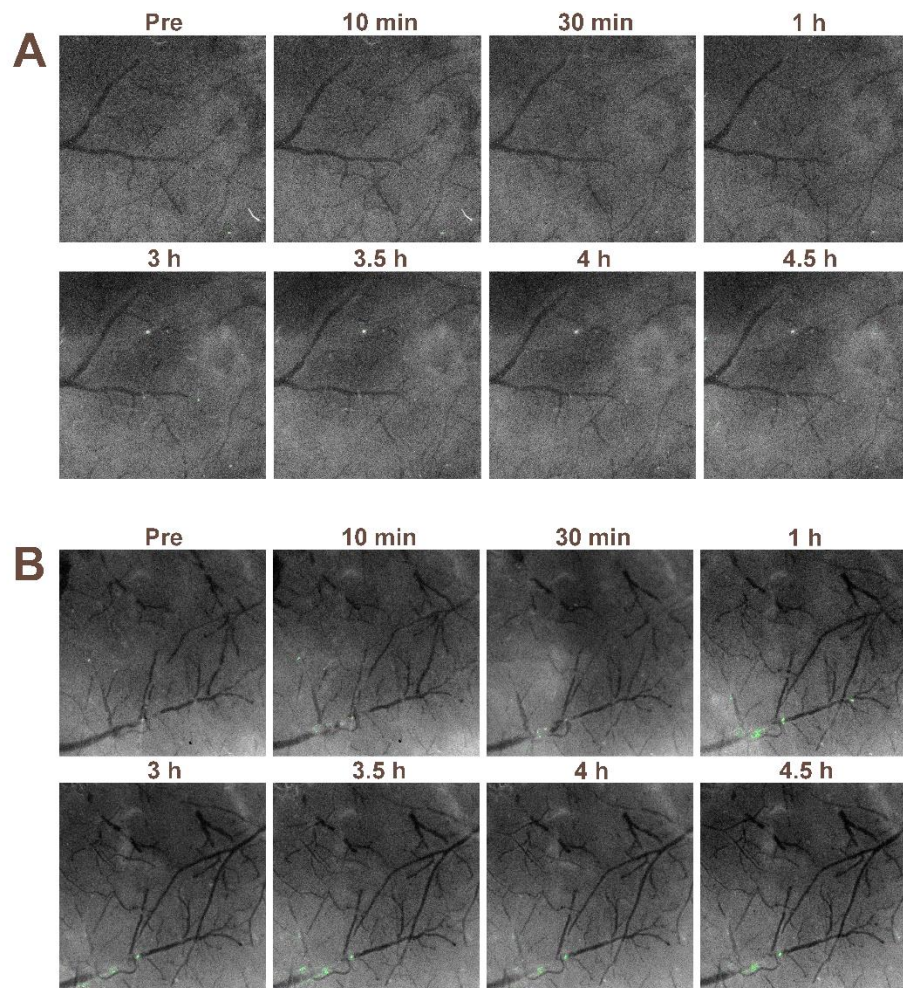

**Figure S9.** Histological analysis of the brain stroke after injected with PBS and DiI-labeled PMVs. Fluorescence and bright field merged stroke vascular vessel images obtained following PBS-DiO (**A**) and DiO-labeled PMVs (**B**) injection.

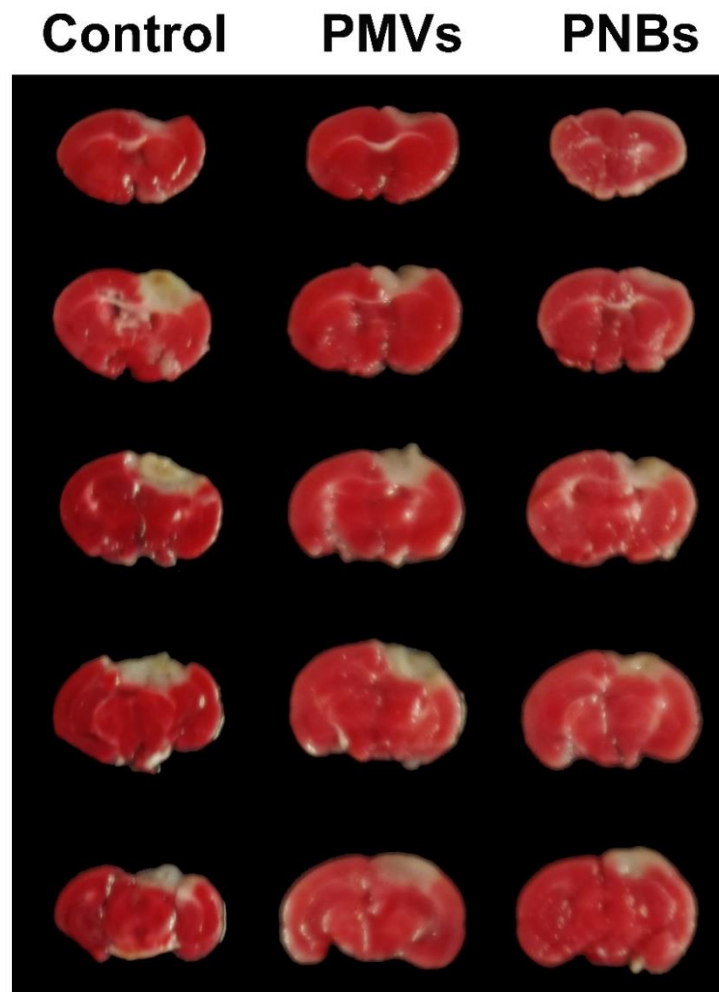

**Figure S10.** The images of brain coronal sections captured by the scanner. Distal photosensitive dye induced stroke occlusion caused infarct (white in color) in the ipsilateral cortex. Mice in PNBs pre-treated group showed less brain lesion infarct.

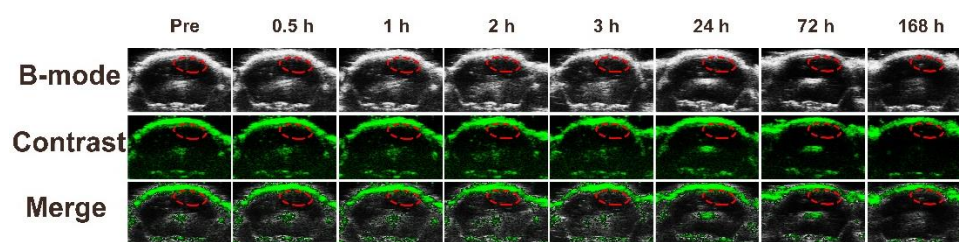

**Figure S11.** *In vivo* ultrasound images of mice brain before (0 h) and after PBS injection at different time points (0.5, 1, 2, 3, 24, 72, 168 h).

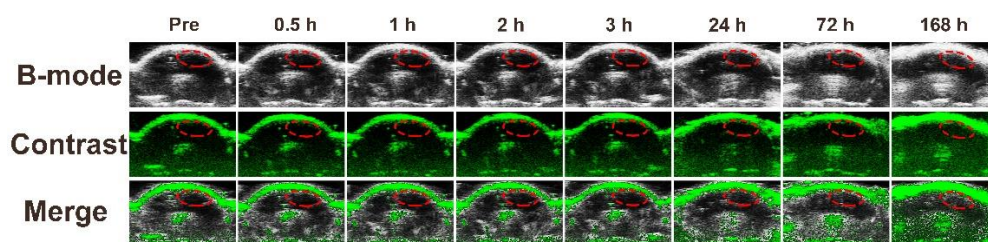

**Figure S12.** *In vivo* ultrasound images of mice brain before (0 h) and after PMVs injection at different time points (0.5, 1, 2, 3, 24, 72, 168 h).

**Table S1.** LC-MS/MS total proteins number analysis of PLT, PMVs and PNBs samples.

|                       | PLT           | PMVs          | PNBs          |
|-----------------------|---------------|---------------|---------------|
| Total proteins number | 2220 $\pm$ 21 | 1971 $\pm$ 13 | 2015 $\pm$ 12 |

**Table S2.** Identified vascular adhesion, thrombus inhibition, and immunoglobulin related receptor proteins for PLT, PMVs and PNBs.

| Protein description                                                                                        | Intensity (a.u.)                 |                                  |                                  |
|------------------------------------------------------------------------------------------------------------|----------------------------------|----------------------------------|----------------------------------|
|                                                                                                            | PLT                              | PMVs                             | PNBs                             |
| Integrin beta-1                                                                                            | $(1.63 \pm 0.09) \times 10^9$    | $(1.23 \pm 0.06) \times 10^{10}$ | $(1.75 \pm 0.12) \times 10^{10}$ |
| Integrin beta-3                                                                                            | $(3.43 \pm 0.19) \times 10^{10}$ | $(1.27 \pm 0.02) \times 10^{11}$ | $(2.01 \pm 0.15) \times 10^{11}$ |
| GPVI (collagen binding)                                                                                    | $(1.67 \pm 0.29) \times 10^9$    | $(9.56 \pm 1.13) \times 10^8$    | $(7.38 \pm 1.14) \times 10^8$    |
| GPIIb-IX-V complex (vWF binding)                                                                           | $(6.57 \pm 0.19) \times 10^{10}$ | $(1.88 \pm 0.08) \times 10^{11}$ | $(2.27 \pm 0.15) \times 10^{11}$ |
| CD47 (immunomodulatory)                                                                                    | $(5.83 \pm 0.38) \times 10^8$    | $(3.55 \pm 0.03) \times 10^9$    | $(2.76 \pm 0.22) \times 10^9$    |
| CD55 (immunomodulatory)                                                                                    | $(3.33 \pm 0.94) \times 10^7$    | $(4.45 \pm 0.65) \times 10^8$    | $(5.04 \pm 0.52) \times 10^8$    |
| CD59 (immunomodulatory)                                                                                    | $(4.03 \pm 0.94) \times 10^7$    | $(3.26 \pm 0.11) \times 10^8$    | $(5.03 \pm 1.25) \times 10^8$    |
| Platelet endothelial cell adhesion molecule (PECAM-1/CD31) (integrin activation for thrombosis/hemostasis) | $(1.38 \pm 0.10) \times 10^9$    | $(1.13 \pm 0.13) \times 10^{10}$ | $(1.20 \pm 0.08) \times 10^{10}$ |
